# Supplementary material for: 3,7-Dihydroxytropolones Inhibit Initiation of Hepatitis B Virus Minus-Strand DNA Synthesis
Source: MDPI journal article supplement (doi:10.3390/molecules25194434), 2020-09-27
Supplement: s1 [file s1]

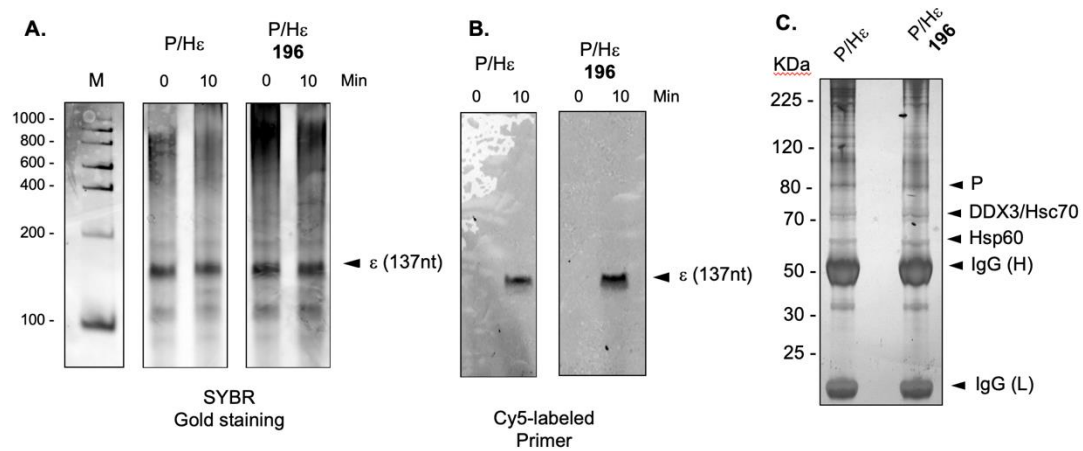

**Supplementary Figure S1.** 3,7-dHT **196** does not compromise the integrity of the HBV priming complex. **A, B**, Priming complexes were analyzed for HBV e RNA in the absence of, and following incubation with, 3,7-dHT **196** by either SYBR Gold staining (**A**) or reverse transcription with a Cy-5-labeled primer (**B**). **C**, Analysis of the protein components of the priming mixture in the absence of, and following incubation with, 3,7-dHT **196** by SDS/PAGE. In (**C**), The lane designated “P/He” is identical to that of Figure 1 C.
